# Supplementary material for: The multi-tissue landscape of somatic mtDNA mutations indicates tissue-specific accumulation and removal in aging
Source: eLife. 2023 Feb 17;12:e83395. doi: 10.7554/eLife.83395 (PMC10072880; doi:10.7554/eLife.83395)
Supplement: Figure 5—source data 1. [file elife-83395-fig5-data1.xlsx]

## Sheet: expected calculations
								Table Column 1 (TC1)										Table Column 2 (TC2)										Table Column 3 (TC3)										Table Column 4 (TC4)											Table Column 5 (TC5)
Figure 5C (Table Columns 1-7 are used to obtain observed and expected values)								Total Observed SNV Count (Same as found on lines 59-65 in Table Column 2)										Total observed SNV (clone + non-clone) counts by tissue and mouse for each mutation class										Observed non-clone (<=2 supporting reads) variants by tissue and mouse for each mutation class										Observed clone (>2 supporting reads) variants by tissue and mouse for each mutation class											Percentage of variants non found in clonal state within each mouse
Mutation Type	Unique SNV Observed	Clone SNV Expected	95% CI (lower, upper)*	Clone SNV Observed	Obs/Exp^	p-value*		SNVs_Count										A>G/T>C Total SNV Count										A>G/T>C Non-Clone Count										A>G/T>C Clone Count											A>G/T>C
T>C/A>G	3670	201.451	174;231	86	-2.34246	<2.2E-16		Events_All	Kidney	Liver	RPE	Retina	Hippocampus	Cerebellum	Muscle	Heart		Sample ID	Kidney	Liver	RPE	Retina	Hippocampus	Cerebellum	Muscle	Heart		Sample ID	Kidney	Liver	RPE	Retina	Hippocampus	Cerebellum	Muscle	Heart		Sample ID	Kidney	Liver	RPE	Retina	Hippocampus	Cerebellum	Muscle	Heart	Total observed		Sample ID
G>A/C>T	16060	895.359	837;956	1352	1.51001	<2.2E-16		JW24-LF	938	740	299	298	375	131	575	281		JW24-LF	89	135	40	36	42	15	113	57		JW24-LF	89	133	40	36	41	15	109	57		JW24-LF	0	2	0	0	1	0	4	0			JW24-LF
G>C/C>G	1308	69.0661	54;87	2	-34.533	<2.2E-16		JW24-NP	1160	1328	351	183	539	446	178	454		JW24-NP	164	283	51	15	64	79	39	106		JW24-NP	162	277	50	14	61	75	38	102		JW24-NP	2	6	1	1	3	4	1	4			JW24-NP
T>G/A>C	169	8.76559	4;17	3	-2.92186	0.0038		JW24-R	1496	1129	860	525	578	469	485	271		JW24-R	180	211	92	45	54	67	54	51		JW24-R	179	207	90	40	52	64	52	47		JW24-R	1	4	2	5	2	3	2	4			JW24-R
T>A/A>T	410	21.4899	13;32	10	-2.14899	0.002		JW26-NP	819	852	714	330	388	339	487	334		JW26-NP	82	180	62	23	29	34	89	71		JW26-NP	81	175	60	22	28	34	84	70		JW26-NP	1	5	2	1	1	0	5	1			JW26-NP
G>T/C>A	2841	145.558	123;171	8	-18.1948	<2.2E-16		OM7-MS	751	771	369	243	274	207	360	254		OM7-MS	86	143	57	24	23	24	83	69		OM7-MS	84	139	56	23	23	23	82	68		OM7-MS	2	4	1	1	0	1	1	1			OM7-MS
		*Used R poisson.test(x=Expected, R=Observed) function to calculate						OM8-MS	1358	563	553	584	367	299	278	336		OM8-MS	190	113	72	45	33	38	55	49		OM8-MS	189	111	72	45	33	37	53	48		OM8-MS	1	2	0	0	0	1	2	1			OM8-MS
	^Found in Column CD							Sum	6522	5383	3146	2163	2521	1891	2363	1930		A>G/T>C Total	791	1065	374	188	245	257	433	403		A>G/T>C Total	784	1042	368	180	238	248	418	392		A>G/T>C Total	7	23	6	8	7	9	15	11	86
																		G>A/C>T Total SNV Count										G>A/C>T Non-Clone Count										G>A/C>T Clone Count											G>A/C>T
								Events_All	Kidney	Liver	RPE	Retina	Hippocampus	Cerebellum	Muscle	Heart		Sample ID	Kidney	Liver	RPE	Retina	Hippocampus	Cerebellum	Muscle	Heart		Sample ID	Kidney	Liver	RPE	Retina	Hippocampus	Cerebellum	Muscle	Heart		Sample ID	Kidney	Liver	RPE	Retina	Hippocampus	Cerebellum	Muscle	Heart			Sample ID
								JW24-LF	938	740	299	298	375	131	575	281		JW24-LF	745	459	224	231	307	92	311	126		JW24-LF	658	428	219	217	299	91	290	121		JW24-LF	87	31	5	14	8	1	21	5			JW24-LF
								JW24-NP	1160	1328	351	183	539	446	178	454		JW24-NP	846	673	223	157	405	298	118	203		JW24-NP	745	598	216	149	385	285	114	189		JW24-NP	101	75	7	8	20	13	4	14			JW24-NP
								JW24-R	1496	1129	860	525	578	469	485	271		JW24-R	1065	680	530	418	470	314	201	140		JW24-R	865	609	497	392	454	303	193	136		JW24-R	200	71	33	26	16	11	8	4			JW24-R
								JW26-NP	819	852	714	330	388	339	487	334		JW26-NP	634	518	487	257	319	225	250	174		JW26-NP	581	470	469	243	312	216	233	169		JW26-NP	53	48	18	14	7	9	17	5			JW26-NP
								OM7-MS	751	771	369	243	274	207	360	254		OM7-MS	585	513	276	205	222	155	191	133		OM7-MS	529	480	268	196	219	149	181	130		OM7-MS	56	33	8	9	3	6	10	3			OM7-MS
								OM8-MS	1358	563	553	584	367	299	278	336		OM8-MS	946	364	417	494	307	224	167	113		OM8-MS	776	347	398	457	298	218	161	107		OM8-MS	170	17	19	37	9	6	6	6			OM8-MS
																		G>A/C>T Total	4821	3207	2157	1762	2030	1308	1238	889		G>A/C>T Total	4154	2932	2067	1654	1967	1262	1172	852		G>A/C>T Total	667	275	90	108	63	46	66	37	1352
																		G>C/C>G Total SNV Count										G>C/C>G Non-Clone Count										G>C/C>G Clone Count											G>C/C>G
								Events_All	Kidney	Liver	RPE	Retina	Hippocampus	Cerebellum	Muscle	Heart		Sample ID	Kidney	Liver	RPE	Retina	Hippocampus	Cerebellum	Muscle	Heart		Sample ID	Kidney	Liver	RPE	Retina	Hippocampus	Cerebellum	Muscle	Heart		Sample ID	Kidney	Liver	RPE	Retina	Hippocampus	Cerebellum	Muscle	Heart			Sample ID
								JW24-LF	938	740	299	298	375	131	575	281		JW24-LF	39	27	1	9	2	10	29	33		JW24-LF	39	27	1	9	2	10	29	33		JW24-LF	0	0	0	0	0	0	0	0			JW24-LF
								JW24-NP	1160	1328	351	183	539	446	178	454		JW24-NP	51	98	22	2	12	15	6	44		JW24-NP	51	98	22	2	12	15	6	44		JW24-NP	0	0	0	0	0	0	0	0			JW24-NP
								JW24-R	1496	1129	860	525	578	469	485	271		JW24-R	81	48	36	20	15	31	86	10		JW24-R	81	48	36	20	15	31	85	10		JW24-R	0	0	0	0	0	0	1	0			JW24-R
								JW26-NP	819	852	714	330	388	339	487	334		JW26-NP	28	24	32	21	13	39	45	20		JW26-NP	28	24	32	21	13	39	45	20		JW26-NP	0	0	0	0	0	0	0	0			JW26-NP
								OM7-MS	751	771	369	243	274	207	360	254		OM7-MS	15	30	3	7	4	9	29	13		OM7-MS	15	30	3	7	4	9	28	13		OM7-MS	0	0	0	0	0	0	1	0			OM7-MS
								OM8-MS	1358	563	553	584	367	299	278	336		OM8-MS	75	17	18	21	7	15	18	80		OM8-MS	75	17	18	21	7	15	18	80		OM8-MS	0	0	0	0	0	0	0	0			OM8-MS
																		G>C/C>G Total	289	244	112	80	53	119	213	200		G>C/C>G Total	289	244	112	80	53	119	211	200		G>C/C>G Total	0	0	0	0	0	0	2	0	2
																		A>C/T>G Total SNV Count										A>C/T>G Non-Clone Count										A>C/T>G Clone Count											A>C/T>G
								Events_All	Kidney	Liver	RPE	Retina	Hippocampus	Cerebellum	Muscle	Heart		Sample ID	Kidney	Liver	RPE	Retina	Hippocampus	Cerebellum	Muscle	Heart		Sample ID	Kidney	Liver	RPE	Retina	Hippocampus	Cerebellum	Muscle	Heart		Sample ID	Kidney	Liver	RPE	Retina	Hippocampus	Cerebellum	Muscle	Heart			Sample ID
								JW24-LF	938	740	299	298	375	131	575	281		JW24-LF	2	15	4	1	1	0	1	0		JW24-LF	2	15	4	1	1	0	1	0		JW24-LF	0	0	0	0	0	0	0	0			JW24-LF
								JW24-NP	1160	1328	351	183	539	446	178	454		JW24-NP	0	19	2	1	1	2	0	2		JW24-NP	0	19	2	1	1	2	0	2		JW24-NP	0	0	0	0	0	0	0	0			JW24-NP
								JW24-R	1496	1129	860	525	578	469	485	271		JW24-R	5	17	5	3	4	2	1	2		JW24-R	5	16	5	3	3	2	1	2		JW24-R	0	1	0	0	1	0	0	0			JW24-R
								JW26-NP	819	852	714	330	388	339	487	334		JW26-NP	3	23	3	2	1	3	2	0		JW26-NP	3	23	3	2	1	3	2	0		JW26-NP	0	0	0	0	0	0	0	0			JW26-NP
								OM7-MS	751	771	369	243	274	207	360	254		OM7-MS	0	15	2	0	0	0	2	3		OM7-MS	0	15	2	0	0	0	2	3		OM7-MS	0	0	0	0	0	0	0	0			OM7-MS
								OM8-MS	1358	563	553	584	367	299	278	336		OM8-MS	3	11	7	1	1	0	0	0		OM8-MS	3	10	7	1	1	0	0	0		OM8-MS	0	1	0	0	0	0	0	0			OM8-MS
																		A>C/T>G Total	13	100	23	8	8	7	6	7		A>C/T>G Total	13	98	23	8	7	7	6	7		A>C/T>G Total	0	2	0	0	1	0	0	0	3
																		A>T/T>A Total SNV Count										A>T/T>A Non-Clone Count										A>T/T>A Clone Count											A>T/T>A
								Events_All	Kidney	Liver	RPE	Retina	Hippocampus	Cerebellum	Muscle	Heart		Sample ID	Kidney	Liver	RPE	Retina	Hippocampus	Cerebellum	Muscle	Heart		Sample ID	Kidney	Liver	RPE	Retina	Hippocampus	Cerebellum	Muscle	Heart		Sample ID	Kidney	Liver	RPE	Retina	Hippocampus	Cerebellum	Muscle	Heart			Sample ID
								JW24-LF	938	740	299	298	375	131	575	281		JW24-LF	8	12	2	6	8	1	13	7		JW24-LF	8	11	2	6	7	1	13	7		JW24-LF	0	1	0	0	1	0	0	0			JW24-LF
								JW24-NP	1160	1328	351	183	539	446	178	454		JW24-NP	18	21	3	1	9	9	5	5		JW24-NP	18	21	3	1	9	9	5	5		JW24-NP	0	0	0	0	0	0	0	0			JW24-NP
								JW24-R	1496	1129	860	525	578	469	485	271		JW24-R	27	24	20	5	16	9	4	3		JW24-R	25	24	20	5	16	8	3	3		JW24-R	2	0	0	0	0	1	1	0			JW24-R
								JW26-NP	819	852	714	330	388	339	487	334		JW26-NP	9	25	3	4	3	3	8	7		JW26-NP	9	25	3	4	3	3	8	7		JW26-NP	0	0	0	0	0	0	0	0			JW26-NP
								OM7-MS	751	771	369	243	274	207	360	254		OM7-MS	4	14	7	1	9	4	7	7		OM7-MS	4	14	7	0	9	4	7	6		OM7-MS	0	0	0	1	0	0	0	1			OM7-MS
								OM8-MS	1358	563	553	584	367	299	278	336		OM8-MS	13	9	10	11	10	2	6	8		OM8-MS	13	9	10	11	9	2	6	7		OM8-MS	0	0	0	0	1	0	0	1			OM8-MS
																		A>T/T>A Total	79	105	45	28	55	28	43	37		A>T/T>A Total	77	104	45	27	53	27	42	35		A>T/T>A Total	2	1	0	1	2	1	1	2	10
																		G>T/C>A Total SNV Count										G>T/C>A Non-Clone Count										G>T/C>A Clone Count											G>T/C>A
								Events_All	Kidney	Liver	RPE	Retina	Hippocampus	Cerebellum	Muscle	Heart		Sample ID	Kidney	Liver	RPE	Retina	Hippocampus	Cerebellum	Muscle	Heart		Sample ID	Kidney	Liver	RPE	Retina	Hippocampus	Cerebellum	Muscle	Heart		Sample ID	Kidney	Liver	RPE	Retina	Hippocampus	Cerebellum	Muscle	Heart			Sample ID
								JW24-LF	938	740	299	298	375	131	575	281		JW24-LF	55	92	28	15	15	13	108	58		JW24-LF	55	92	28	15	15	13	108	58		JW24-LF	0	0	0	0	0	0	0	0			JW24-LF
								JW24-NP	1160	1328	351	183	539	446	178	454		JW24-NP	81	234	50	7	48	43	10	94		JW24-NP	80	233	50	7	48	43	10	94		JW24-NP	1	1	0	0	0	0	0	0			JW24-NP
								JW24-R	1496	1129	860	525	578	469	485	271		JW24-R	138	149	177	34	19	46	139	65		JW24-R	138	149	177	34	19	46	138	65		JW24-R	0	0	0	0	0	0	1	0			JW24-R
								JW26-NP	819	852	714	330	388	339	487	334		JW26-NP	63	82	127	23	23	35	93	62		JW26-NP	63	81	127	23	23	35	93	62		JW26-NP	0	1	0	0	0	0	0	0			JW26-NP
								OM7-MS	751	771	369	243	274	207	360	254		OM7-MS	61	56	24	6	16	15	48	29		OM7-MS	61	56	24	6	16	15	48	29		OM7-MS	0	0	0	0	0	0	0	0			OM7-MS
								OM8-MS	1358	563	553	584	367	299	278	336		OM8-MS	131	49	29	12	9	20	32	86		OM8-MS	130	49	28	12	7	20	32	86		OM8-MS	1	0	1	0	2	0	0	0			OM8-MS
																		G>T/C>A Total	529	662	435	97	130	172	430	394		G>T/C>A Total	527	660	434	97	128	172	429	394		G>T/C>A Total	2	2	1	0	2	0	1	0	8
																		Total SNV Count										Total Non-Clone Count										Total Clone Count
								Events_All	Kidney	Liver	RPE	Retina	Hippocampus	Cerebellum	Muscle	Heart		Sample ID	Kidney	Liver	RPE	Retina	Hippocampus	Cerebellum	Muscle	Heart		Sample ID	Kidney	Liver	RPE	Retina	Hippocampus	Cerebellum	Muscle	Heart		Sample ID	Kidney	Liver	RPE	Retina	Hippocampus	Cerebellum	Muscle	Heart
								JW24-LF	938	740	299	298	375	131	575	281		JW24-LF	938	740	299	298	375	131	575	281		JW24-LF	851	706	294	284	365	130	550	276		JW24-LF	87	34	5	14	10	1	25	5
								JW24-NP	1160	1328	351	183	539	446	178	454		JW24-NP	1160	1328	351	183	539	446	178	454		JW24-NP	1056	1246	343	174	516	429	173	436		JW24-NP	104	82	8	9	23	17	5	18
								JW24-R	1496	1129	860	525	578	469	485	271		JW24-R	1496	1129	860	525	578	469	485	271		JW24-R	1293	1053	825	494	559	454	472	263		JW24-R	203	76	35	31	19	15	13	8
								JW26-NP	819	852	714	330	388	339	487	334		JW26-NP	819	852	714	330	388	339	487	334		JW26-NP	765	798	694	315	380	330	465	328		JW26-NP	54	54	20	15	8	9	22	6
								OM7-MS	751	771	369	243	274	207	360	254		OM7-MS	751	771	369	243	274	207	360	254		OM7-MS	693	734	360	232	271	200	348	249		OM7-MS	58	37	9	11	3	7	12	5
								OM8-MS	1358	563	553	584	367	299	278	336		OM8-MS	1358	563	553	584	367	299	278	336		OM8-MS	1186	543	533	547	355	292	270	328		OM8-MS	172	20	20	37	12	7	8	8
																		Total SNV Count	6522	5383	3146	2163	2521	1891	2363	1930		Total Clone Count	5844	5080	3049	2046	2446	1835	2278	1880		Total Clone Count	678	303	97	117	75	56	85	50	1461
[truncated: 29 more columns]
